# Supplementary material
Source: PubMed Central journal article supplement (PMC11105042)
Supplement: 18_2019_3357_MOESM1_ESM.pdf [file 18_2019_3357_MOESM1_ESM.pdf]

## NATIVE PAGE

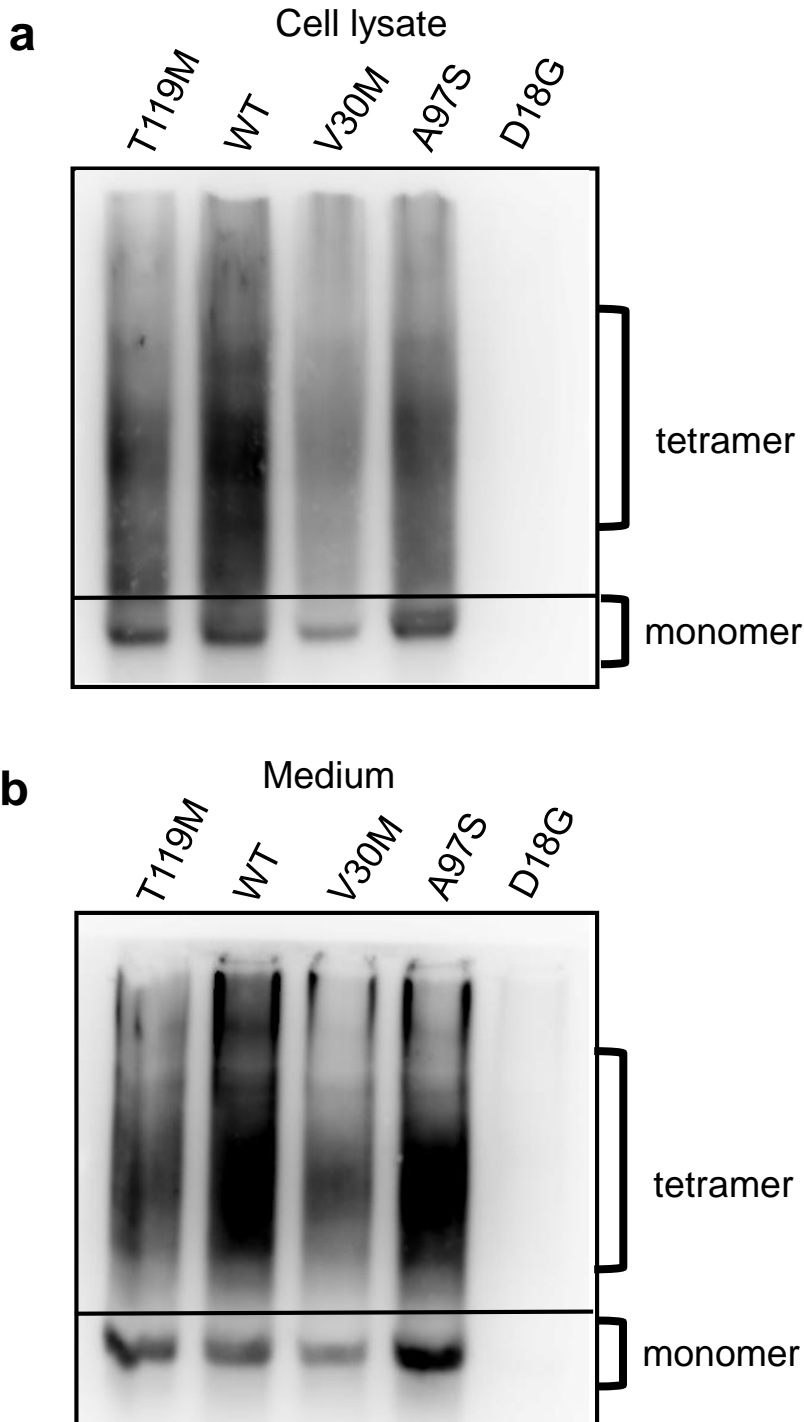

**Supplementary Figure S1. Secretion pattern of wild-type TTR and TTR variants in native PAGE.** (a-b) Wild-type and variant TTRs were transiently transfected in HEK293 cells for 24 hours. Cell lysate and media samples were suspended in native sample buffer and not boiled before loading onto gels. Protein samples were examined by native PAGE. Western blots were probed using anti-human TTR antibody. Both monomeric and tetrameric forms of TTR were resolved.

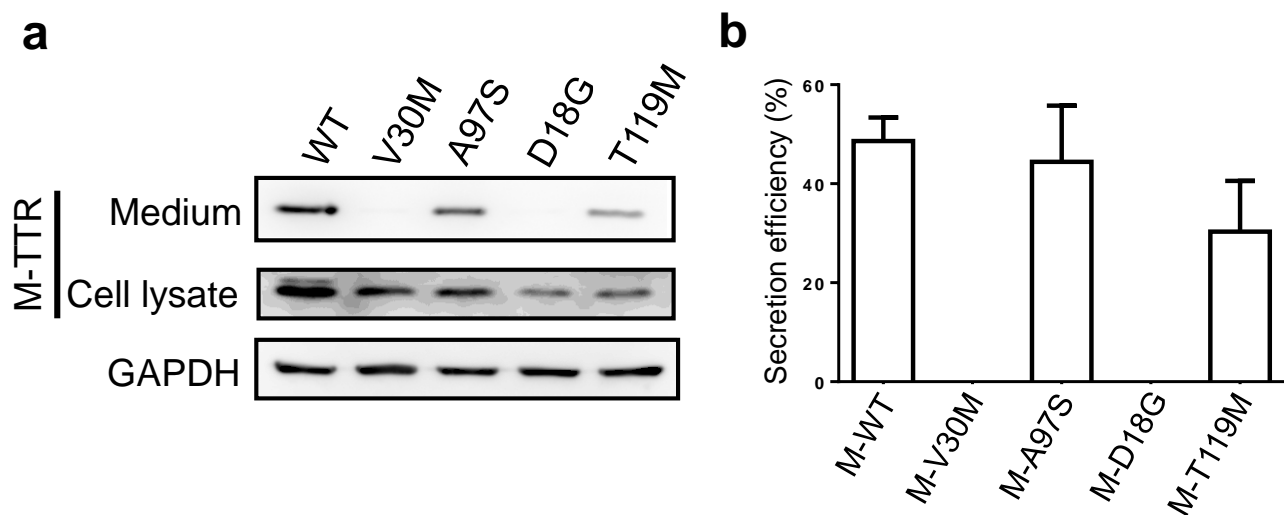

**Supplementary Figure S2. Efficient secretion of amyloidogenic late-onset monomeric TTRs (M-TTRs).** (a) Western blot of both cell lysate and medium samples were analyzed using anti-human TTR antibody. (b) Secretion efficiency of wild type M-TTR, M-A97S and M-T119M variants.

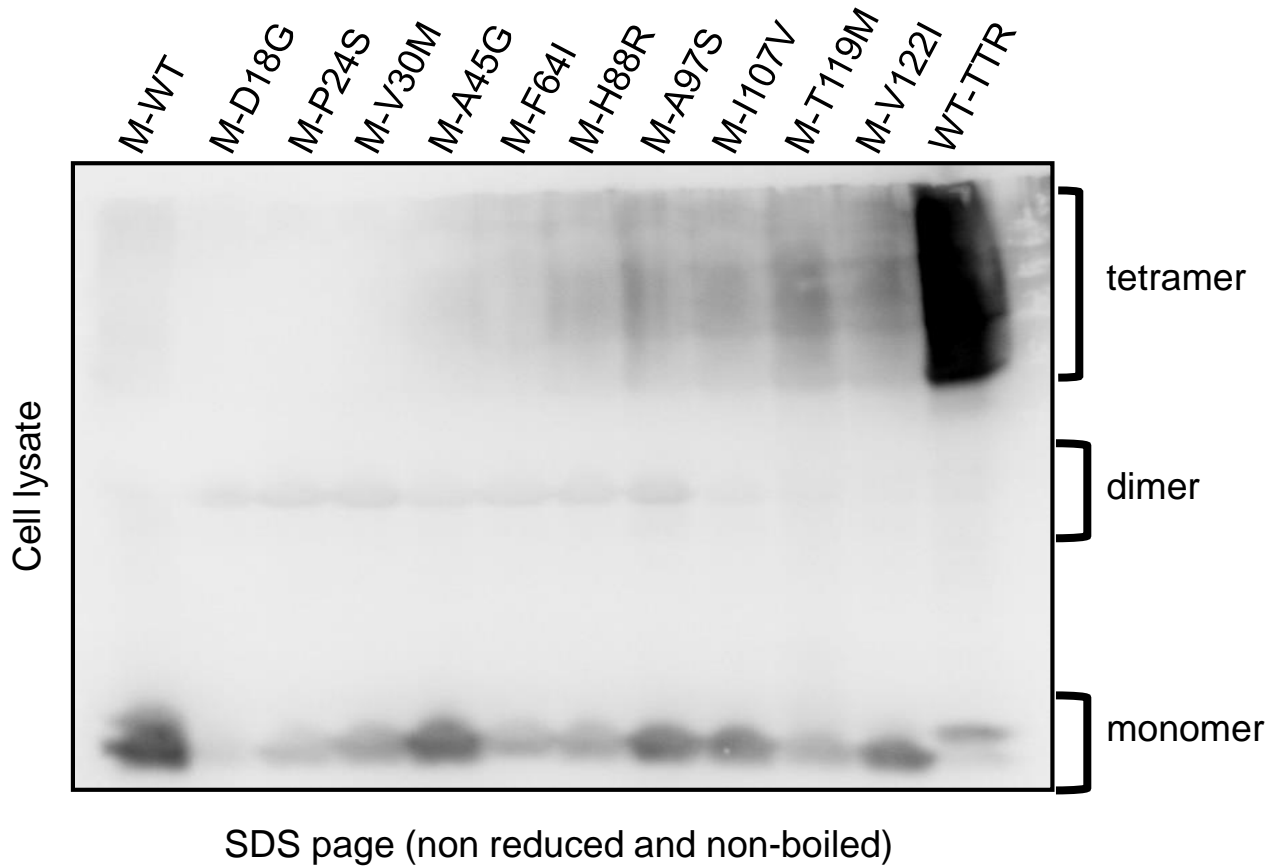

**Supplementary Figure S3. Expression pattern of amyloidogenic late onset monomeric TTRs (M-TTRs) in non-reduced, non-boiled SDS PAGE.** Wild-type M-TTR, variant M-TTRs and tetrameric WT-TTR were transiently transfected in HEK293 cells for 24 hours. Cell lysate and media samples were suspended in native sample buffer and not boiled before loading onto gels. Protein samples (non-reduced and non-boiled) were examined by SDS PAGE. Western blots were probed using anti-human TTR antibody. WT-TTR is expressed as the tetrameric form while other M-TTR are mostly in their monomeric forms.

## NATIVE PAGE

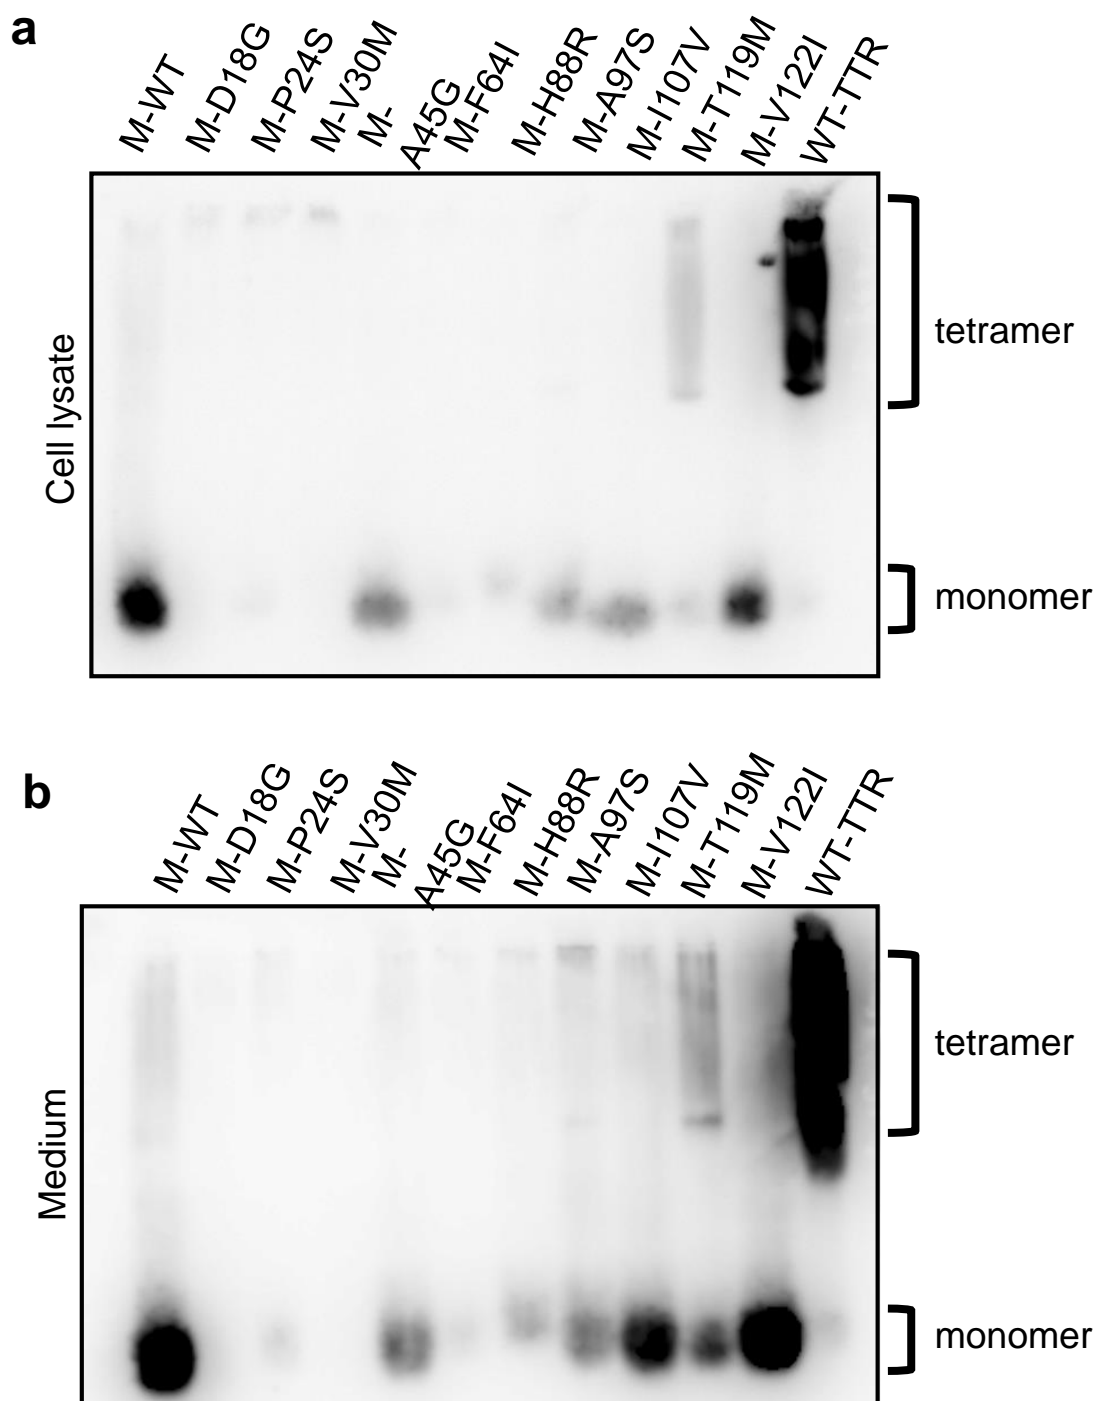

**Supplementary Figure S4. Secretion pattern of amyloidogenic late onset monomeric TTRs (M-TTRs) in native PAGE.** (a, b) WT, mutant M-TTRs and tetrameric WT-TTR were transiently transfected in HEK293 cells for 24 hours. Cell lysate and media samples were suspended in native sample buffer and not boiled before loading onto gels. Protein samples were resolved by native PAGE. Western blots were probed using anti-human TTR antibody. While WT TTR is secreted in tetrameric form, other late-onset M-TTRs could be secreted as monomers (b). The stable T119M M-TTR was detected in both tetrameric and monomeric forms, an indication of its inhibitory effect against monomer formation.
